# Supplementary material
Source: PubMed Central journal article supplement (PMC2857674)
Supplement: NIHMS188762-supplement-Supplemental_Figure.pdf [file NIHMS188762-supplement-Supplemental_Figure.pdf]

# Alda-1 is an agonist and chemical chaperone for the common human aldehyde dehydrogenase 2 variant

Samantha Perez-Miller, Hina Younus, Ram Vanam, Che-Hong Chen, Daria Mochly-Rosen and Thomas D. Hurley

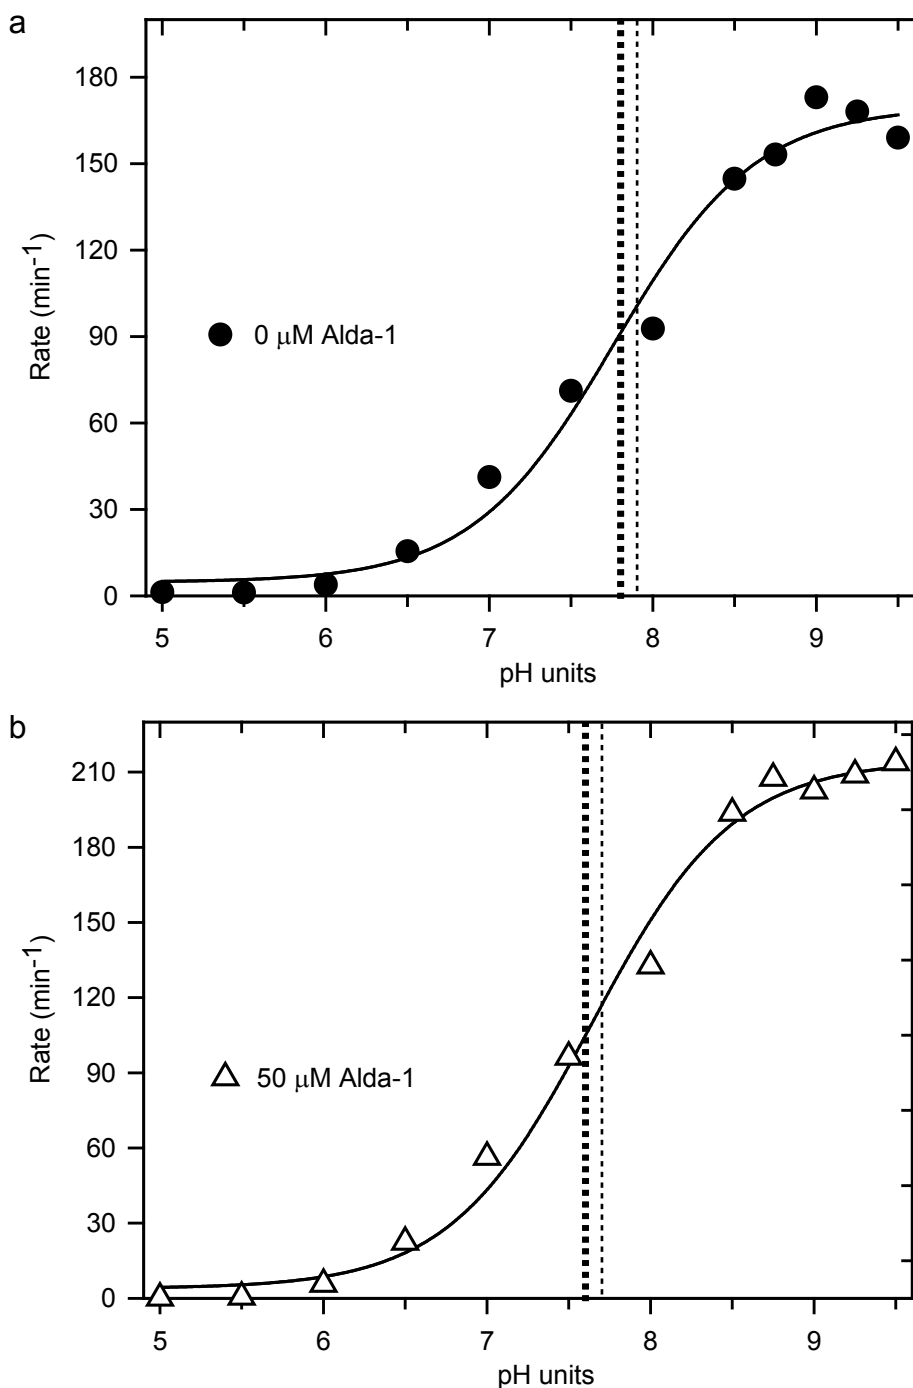

**Supplementary Figure 1** *Dependence of ALDH2-catalyzed hydrolysis of para-nitrophenylacetate on pH.* The rate of nitrophenol formation by ALDH2-catalyzed hydrolysis of para-nitrophenylacetate was monitored as a function of pH in the absence (a) and presence (b) of 50  $\mu\text{M}$  Alda-1. In each panel, the apparent  $\text{pK}_a$  values for ester hydrolysis are indicated by the dashed vertical lines ( $\text{pK}_a = 7.8$  in the absence of Alda-1 and  $\text{pK}_a = 7.6$  in the presence of Alda-1).
